# Supplementary material for: Large-area 2D microgel colloidal crystals fabricated via benzophenone-based photochemical reaction
Source: Royal Society of Chemistry journal article supplement (doi:10.1039/c6ra18622j), 2016-01-01
Supplement: c6ra18622j1.pdf [file c6ra18622j1.pdf]

Supporting information for

## Large-area 2D microgel colloidal crystals fabricated via benzophenone-based photochemical reaction

Junying Weng, Xiaoyun Li, Ying Guan, \* X.X. Zhu, and Yongjun Zhang\*

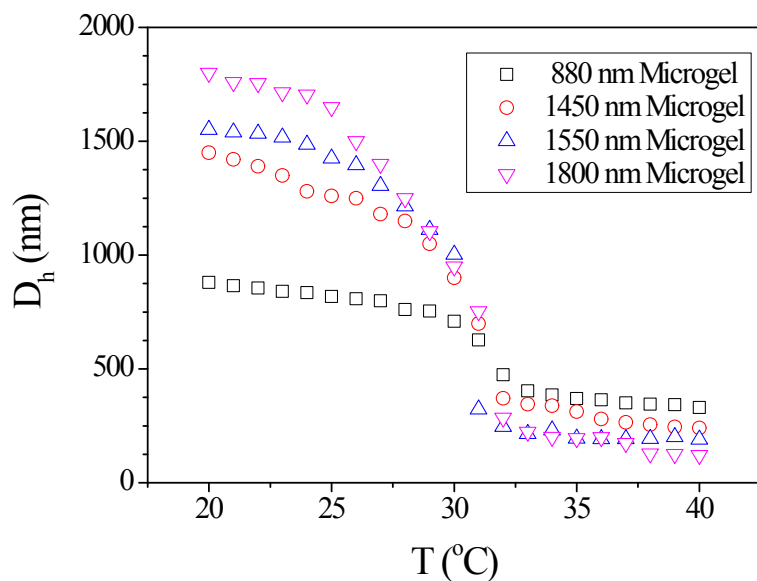

Fig. S1. Hydrodynamic diameter ( $D_h$ ) of the microgels measured at various temperatures. pH=3.5.

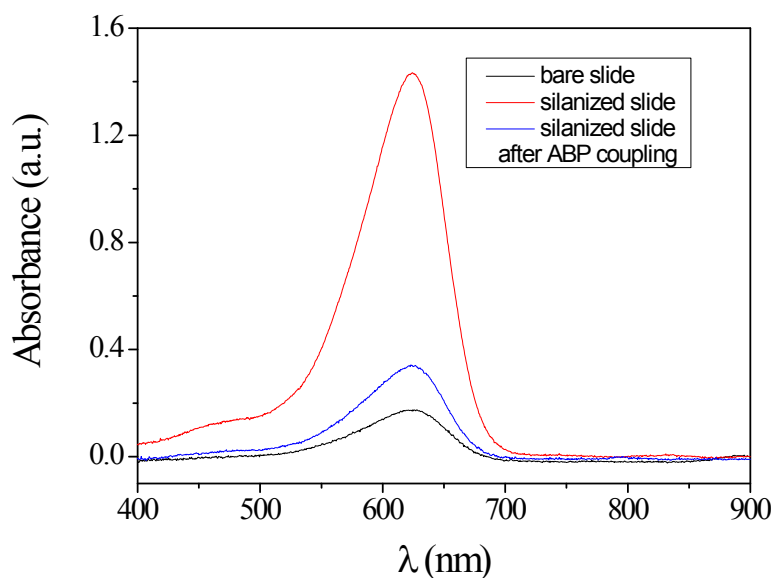

Fig. S2. Absorption spectra of the desorbed Toluidine Blue O dye from bare quartz slide (black), and the silanized slide before (red) and after coupling with 4-aminobenzophenone (blue).

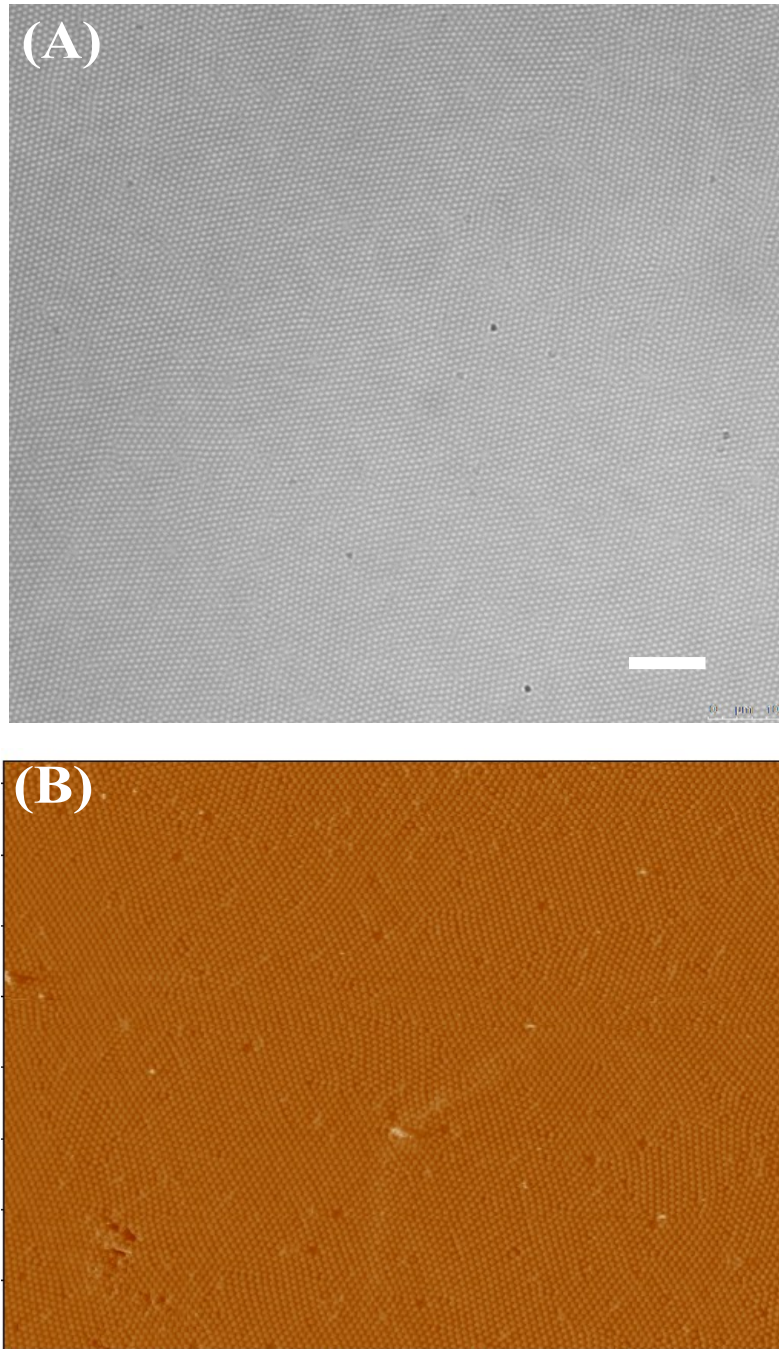

Fig. S3. Large area optical microscopy image (A) and AFM image (B) of a 2D CC fabricated from the 1450 nm microgel. The scale bar is 10 μm. Scanning size of the AFM image is 100.143 μm × 89.164 μm.

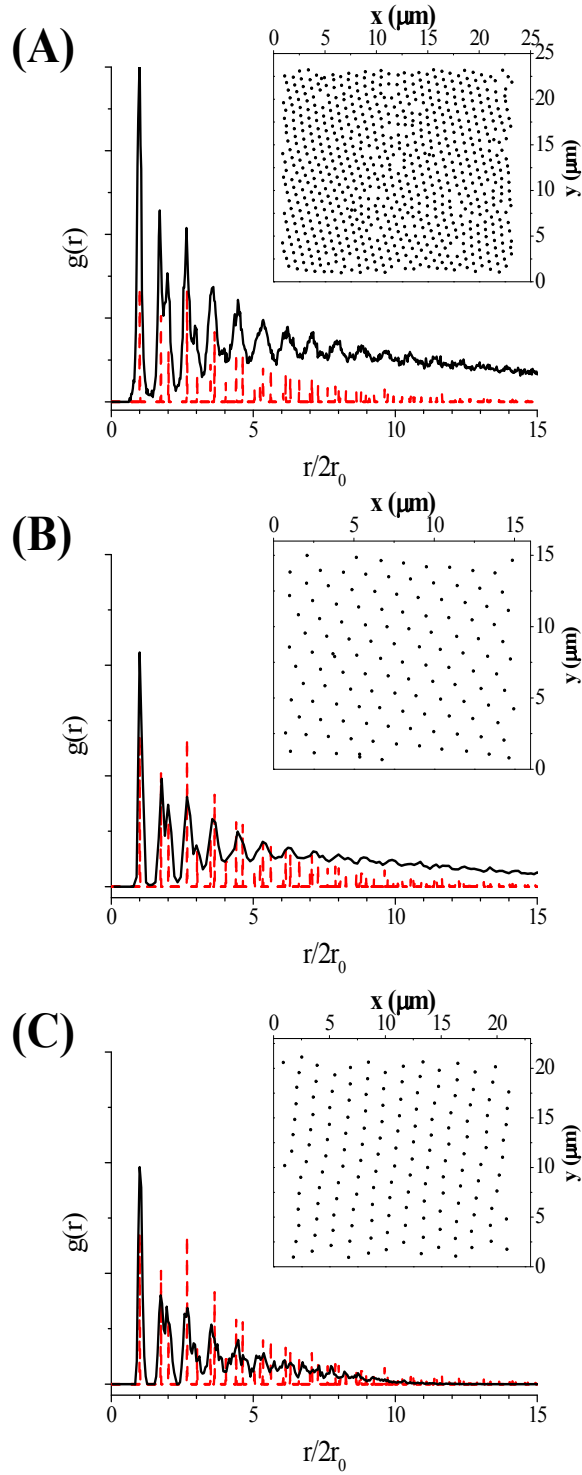

Fig. S4. Pair correlation function,  $g(r)$ , of the 2D CC from 880 (A), 1550 (B) and 1800 nm microgel (C). Dash vertical lines indicate the peaks of  $g(r)$  of an ideal hexagonally packed monolayer generated numerically. The inset highlights the centers of the particles as found from the automated particle location procedure.

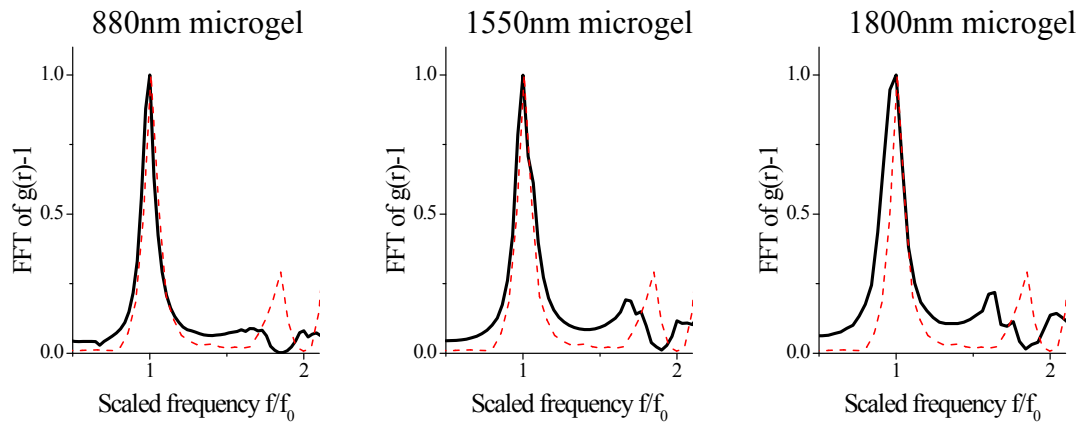

Fig. S5. Single-sided power spectra Fourier transforms (FT) of  $g(r)$  compared to FT of the corresponding perfectly ordered arrays (dash line). The power spectra were scaled to have identical maxima at  $f/f_0 = 1.0$ .
